# Supplementary material
Source: PubMed Central journal article supplement (PMC7445671)
Supplement: etj-0009-0186-s02.pdf [file etj-0009-0186-s02.pdf]

Deeks' Funnel Plot Asymmetry Test  
pvalue = 0.39

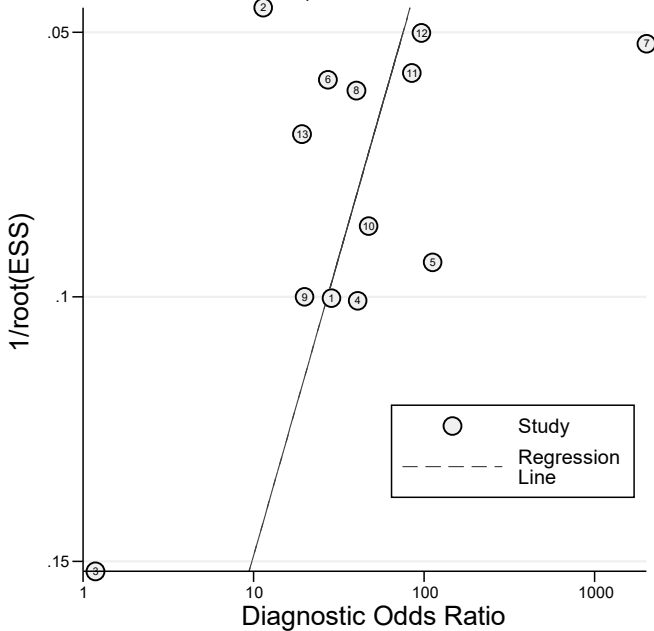

**Supplemental Figure 1.** Deeks' funnel plot for the assessment of publication bias.
